# Supplementary material for: Exploration of the Strategy for Improving the Expression of Heterologous Sweet Protein Monellin in Aspergillus niger
Source: MDPI journal article supplement (doi:10.3390/jof9050528), 2023-04-29
Supplement: s1 [file s1]

## Supplementary information for

# Exploration of the Strategy for Improving the Expression of Heterologous Sweet Protein Monellin in *Aspergillus niger*

Ke Li, Jun-Wei Zheng, Le-Yi Yu, Bin Wang and Li Pan \*

School of Biology and Biological Engineering, South China University of Technology, Guangzhou Higher Education Mega Center, Guangzhou 510006, China; 202020148715@mail.scut.edu.cn (K.L.); 20710106321@mail.scut.edu.cn (J.-W.Z.); 201911008179@mail.scut.edu.cn (L.-Y.Y.); btbinwang@scut.edu.cn (B.W.)

\* Correspondence: btlipan@scut.edu.cn

## Catalogue of supplementary materials

**Table S1** The medium and its components used in this study

**Table S2.** The amino acid sequence and optimized base sequence of monellin expressed in this study

**Table S3.** Primers for CRISPR/Cas9 plasmid construction in this study

**Table S4.** The gene-specific primers used for qRT-PCR analysis

**Table S5.** Reaction mixture for qRT-PCR analysis

**Table S6.** The condition of qRT-PCR cycle

**Table S7.** Primers used in the identification of transformants in this study

**Figure S1.** Schematic diagram of the CRISPR/Cas9 plasmid used in this study

**Figure S2.** Upstream and downstream positioning of the MH genome

**Figure S3.** Schematic diagram of gene deletion and overexpression

**Figure S4.** The relative transcription of *ino2* and *opi3* in each strain.

Table S1 The medium and its components used in this study

| media                      | Components and their contents                                                                                                                                                                                                         |
|----------------------------|---------------------------------------------------------------------------------------------------------------------------------------------------------------------------------------------------------------------------------------|
| Luria-Bertani (LB)         | peptone 1% (w/v), yeast extract 0.5% (w/v), and NaCl 1% (w/v)                                                                                                                                                                         |
| Czapek-Dox medium (CD)     | glucose 2% (w/v), NaNO <sub>3</sub> 0.3% (w/v), KCl 0.2% (w/v), MgSO <sub>4</sub> -7H <sub>2</sub> O 0.05% (w/v), KH <sub>2</sub> PO <sub>4</sub> 0.1% (w/v), FeSO <sub>4</sub> -7H <sub>2</sub> O 0.001% (w/v), and Agar 0.05% (w/v) |
| The hyperosmotic CD medium | sucrose 35% (w/v), NaNO <sub>3</sub> 0.3% (w/v), KCl 0.2% (w/v), MgSO <sub>4</sub> -7H <sub>2</sub> O 0.05% (w/v), KH <sub>2</sub> PO <sub>4</sub> 0.1% (w/v), and FeSO <sub>4</sub> -7H <sub>2</sub> O 0.001% (w/v)                  |
| DPY medium                 | glucose 2% (w/v), peptone 1% (w/v), yeast extract 0.5% (w/v), KH <sub>2</sub> PO <sub>4</sub> 0.5% (w/v), and MgSO <sub>4</sub> -7H <sub>2</sub> O 0.05% (w/v)                                                                        |
| Starch fermentation medium | starch 5% (w/v), corn pulp 3% (w/v), and soybean meal powder 2% (w/v)                                                                                                                                                                 |

Table S2. The amino acid sequence and optimized base sequence of monellin expressed in this study

| The amino acid sequence and optimized base sequence of monellin                                                                                                                                                                                                                                                                                                                                                                                                                                                                                                                                                                                                                                                                                                                                                                                                                                                                                                         |
|-------------------------------------------------------------------------------------------------------------------------------------------------------------------------------------------------------------------------------------------------------------------------------------------------------------------------------------------------------------------------------------------------------------------------------------------------------------------------------------------------------------------------------------------------------------------------------------------------------------------------------------------------------------------------------------------------------------------------------------------------------------------------------------------------------------------------------------------------------------------------------------------------------------------------------------------------------------------------|
| <p>Green: Signal peptide of <i>glaA</i></p> <p>Blue: 8*His tag</p> <p>Red: amino acid sequence of monellin</p> <p>Black: linker</p> <p>Orange: the HiBiT-tag</p> <p>MSFRSLLALSGLVCTGLAHHHHHHHHGEWEIIDIGPFTQNLGKFAVDEENKI<br/> GQYGRLTFNKVIRPCMKKTIYEENGFREIKGYEYQLYVYASDKLFRADISED<br/> YKTRGRKLLRFNGPVPPP<span style="color: black;">GSGSG</span><span style="color: orange;">VSGWRSFKKIS</span>*</p> <p>ATGTCGTTCCGATCTCTACTCGCCCTGAGCGGCCTCGTCTGCACAGGGTT<br/> GGCACATCACCACCACCATCATCATCACGGGGAATGGGAGATCATCGACA<br/> TTGGCCCCTTCACGCAGAACTTGGGAAAATTTGCAGTGGATGAGGAGAA<br/> CAAAATAGGACAATACGGCAGACTTACATTCAACAAGGTCATTCGCCCTT<br/> GCATGAAGAAGACCATCTACGAAGAGAATGGCTTCCGAGAAATCAAGGG<br/> TTATGAGTACCAGCTATATGTCTATGCCTCGGATAAGCTCTTCCGCGCTGA<br/> TATTTCCGAAGACTACAAGACTCGTGGGCGGAAACTGCTGAGGTTTAATG<br/> GTCCGGTTCCCCCACCTGGCAGTGGATCTGGAGT<span style="color: orange;">GAGCGGCTGGCGGTC</span><br/> <span style="color: orange;">GTTCAAGAAGATTAGCTAA</span></p> |

Table S3. Primers for CRISPR/Cas9 plasmid construction in this study

| Primer               | Sequences (5'→3')                                                | Description                            |
|----------------------|------------------------------------------------------------------|----------------------------------------|
| PAfU6-F              | gtttccgctgagggtttaatttaattaagcaggcg<br>gttgcaagcgatc             | Amplification of PAfU6                 |
| PAfU6-R              | ctttcattcttacagacctct                                            | Amplification of PAfU6                 |
| PAoU6-F              | tctgcggaacatatactgggcccggaatggtc<br>acttctcttagaaa               | Amplification of PAoU6                 |
| TU6-R                | ctgtctcggctgaggtcttaagcagctctatatca<br>cgtgacg                   | Amplification of TU6                   |
| <i>amyA</i> sgrRNA-F | ggtctgtaagaatgaaagtcttcggcccttcataga<br>gagggttttagagctagaaatagc | Amplification of<br><i>amyA</i> sgrRNA |
| <i>glaA</i> sgrRNA-F | ggtctgtaagaatgaaagggtgagcaacgaagc<br>gaccgggttttagagctagaaatagc  | Amplification of<br><i>glaA</i> sgrRNA |
| <i>aamA</i> sgrRNA-F | ggtctgtaagaatgaaagcgcatgggtgaagctta<br>ccaggttttagagctagaaatagc  | Amplification of<br><i>aamA</i> sgrRNA |
| <i>pepA</i> sgrRNA-F | ggtctgtaagaatgaaagggtgccccagagcgt<br>gaagggttttagagctagaaatagc   | Amplification of<br><i>pepA</i> sgrRNA |
| <i>pepB</i> sgrRNA-F | ggtctgtaagaatgaaaggatcgggcgacggcta<br>caccaggttttagagctagaaatagc | Amplification of<br><i>pepB</i> sgrRNA |
| <i>derA</i> sgrRNA-F | ggtctgtaagaatgaaagtgaatgccatcagaac<br>ccagggttttagagctagaaatagc  | Amplification of<br><i>derA</i> sgrRNA |
| <i>hrdC</i> sgrRNA-F | ggtctgtaagaatgaaaggcttgggtttatgtatg<br>caaggttttagagctagaaatagc  | Amplification of<br><i>hrdC</i> sgrRNA |

Note\*: The red marked part of the table are the 20bp protospacers

Table S4. The gene-specific primers used for qRT-PCR analysis

| Primer sequence (5'-3') |                       | Description             |
|-------------------------|-----------------------|-------------------------|
| <i>gpdA</i> -F          | TCTGCTCCTTCCGCTGATG   | Reference gene          |
| <i>gpdA</i> -R          | CCCTCAACGATGCCGAAC    | Reference gene          |
| <i>Opi3</i> -F          | GGCTGCTACTTCCTCGCTG   | Target gene <i>opi3</i> |
| <i>Opi3</i> -R          | AGGGGCATAATAAGGTTGGTC | Target gene <i>opi3</i> |
| <i>Ino2</i> -F          | AGAAGACGACGACCATACGG  | Target gene <i>ino2</i> |
| <i>Ino2</i> -R          | GGGCTTTGGACCTTGAGAA   | Target gene <i>ino2</i> |
| <i>bipA</i> -F          | ACCGTCCCCGCCTACTTC    | Target gene <i>bipA</i> |
| <i>bipA</i> -R          | CACCAGTCTTGTCCAATCCGT | Target gene <i>bipA</i> |
| <i>pdiA</i> -F          | CCAAGATGTTTCGGTGCCC   | Target gene <i>pdiA</i> |
| <i>pdiA</i> -R          | CCTGGTCATAGGGGTATTTGG | Target gene <i>pdiA</i> |
| <i>Pha1</i> -F          | CAGTCACCGACGCCAGAA    | Target gene <i>pha1</i> |
| <i>Pha1</i> -R          | TGTTTCGCACCAGGCTTCA   | Target gene <i>pha1</i> |
| <i>Sed5</i> -F          | CGCTCCGATTCCCCACTT    | Target gene <i>sed5</i> |
| <i>Sed5</i> -R          | ATTGCCTCACCACGCCCT    | Target gene <i>sed5</i> |

Table S5. Reaction mixture for qRT-PCR analysis

| Reaction Component        | Concentration | Volume( $\mu$ l) |
|---------------------------|---------------|------------------|
| SybrGreen qPCR Master Mix | 2X            | 10               |
| Primer F (10 $\mu$ M)     | 10 $\mu$ M    | 0.4              |
| Primer F (10 $\mu$ M)     | 10 $\mu$ M    | 0.4              |
| ddH <sub>2</sub> O        | /             | 7.2              |
| Template (cDNA)           | /             | 2                |
| Total                     | /             | 20               |

Table S6. The condition of qRT-PCR cycle

| Thermal Cycler                                                     | Times and Temperatures |                   |               | Dissociation                      |
|--------------------------------------------------------------------|------------------------|-------------------|---------------|-----------------------------------|
|                                                                    | Initial Steps          | Each of 45 cycles |               | Accoding to instrument guidelines |
|                                                                    |                        | Melt              | Anneal/Extend |                                   |
| QuantStudio™ 1 Plus<br>Fluorescence quantitative<br>PCR instrument | HOLD                   | CYCLE             |               |                                   |
|                                                                    | 3 min<br>95°C          | 15 s 95°C         | 30 s 60°C     |                                   |

Table S7. Primers used in the identification of transformants in this study

| Primer            | Sequences (5'→3')      | Function description                          |
|-------------------|------------------------|-----------------------------------------------|
| Monecds-F         | TGGCCCCTTCACGCAGAAC    | Monellin DNA sequence validation              |
| Monecds-R         | AAACCTCAGCAGTTTCCGCC   | Monellin DNA sequence validation              |
| <i>gla</i> AUY-F  | GGACCTTATTCGCCTTGTTT   | Location of monellin in the <i>glaA</i> locus |
| <i>gla</i> AUY-R  | GCGAATGACCTTGTTGAATG   | Location of monellin in the <i>glaA</i> locus |
| <i>gla</i> ADY-F  | CGGCAGACTTACATTCAACA   | Location of monellin in the <i>glaA</i> locus |
| <i>gla</i> ADY-R  | TTTTCGTTGAAGCCTTGAGC   | Location of monellin in the <i>glaA</i> locus |
| <i>pep</i> Acds-F | GTCACCACCAACAAGCAGG    | Identify whether <i>pepA</i> has been deleted |
| <i>pep</i> Acds-R | CGGCGAAAAGGGGAGAGTC    | Identify whether <i>pepA</i> has been deleted |
| <i>pep</i> Bcds-F | ACTGGCGAGTTCACGTGTC    | Identify whether <i>pepB</i> has been deleted |
| <i>pep</i> Bcds-R | TACCAGGCATCGTAGGAAG    | Identify whether <i>pepB</i> has been deleted |
| <i>der</i> Acds-F | CTCGCCATTTCTCTCCCTT    | Identify whether <i>derA</i> has been deleted |
| <i>der</i> Acds-R | CGTGAAGCGAAGGGTAAAC    | Identify whether <i>derA</i> has been deleted |
| <i>hrd</i> Ccds-F | ATGCTTGGGTTTATGTATG    | Identify whether <i>hrdC</i> has been deleted |
| <i>hrd</i> Ccds-R | CCTTCACCATAAACACCAC    | Identify whether <i>hrdC</i> has been deleted |
| <i>aam</i> Acds-F | TCCACCCATACTGCCTGAT    | Verify whether <i>aamA</i> has been replaced  |
| <i>aam</i> Acds-F | GTAGAGGTTGCTGATGCTG    | Verify whether <i>aamA</i> has been replaced  |
| <i>aam</i> AUY-F  | CAACGGTTTGCAGGGTCAT    | Location of gene overexpression cassette      |
| <i>aam</i> ADY-R  | AGGGACATGCTGAGAACCA    | Location of gene overexpression cassette      |
| <i>amy</i> AUY-F  | CTAGCTGCACTAGGAAGCAAT  | Location of 3M in the <i>amyA</i> locus       |
| <i>amy</i> AUY-R  | ACTCCGTCACCAAGATCACTAT | Location of 3M in the <i>amyA</i> locus       |
| <i>amy</i> ADY-F  | CAGCGGATTTGAAGTTCAGG   | Location of 3M in the <i>amyA</i> locus       |



|                  |                      |                                                  |
|------------------|----------------------|--------------------------------------------------|
|                  |                      | locus                                            |
| <i>amy</i> ADY-R | AGCGCTTTTGCTTCCTTGCA | Location of 3M in the <i>amyA</i> locus          |
| <i>pepA</i> UY-F | CCAGTCTCACGGCATCAGT  | Location of <i>ino2</i> in the <i>pepA</i> locus |
| <i>pepA</i> UY-R | AGGCTGCGGACTATTCTGG  | Location of <i>ino2</i> in the <i>pepA</i> locus |
| <i>pepA</i> DY-F | CAAAGCCCGCACGAGAGAA  | Location of <i>ino2</i> in the <i>pepA</i> locus |
| <i>pepA</i> DY-R | CAGTCCCCGAGACGGTTTA  | Location of <i>ino2</i> in the <i>pepA</i> locus |
| <i>pepB</i> UY-F | GCAACATTCGTCAAGGAGT  | Location of <i>opi3</i> in the <i>pepB</i> locus |
| <i>pepB</i> UY-R | AAGGGAGCGTAGAAGAAGA  | Location of <i>opi3</i> in the <i>pepB</i> locus |
| <i>pepB</i> DY-F | ATGGTAGAAACCCACTGAC  | Location of <i>opi3</i> in the <i>pepB</i> locus |
| <i>pepB</i> DY-R | TCCATTCTTTTGCTTACAT  | Location of <i>opi3</i> in the <i>pepB</i> locus |

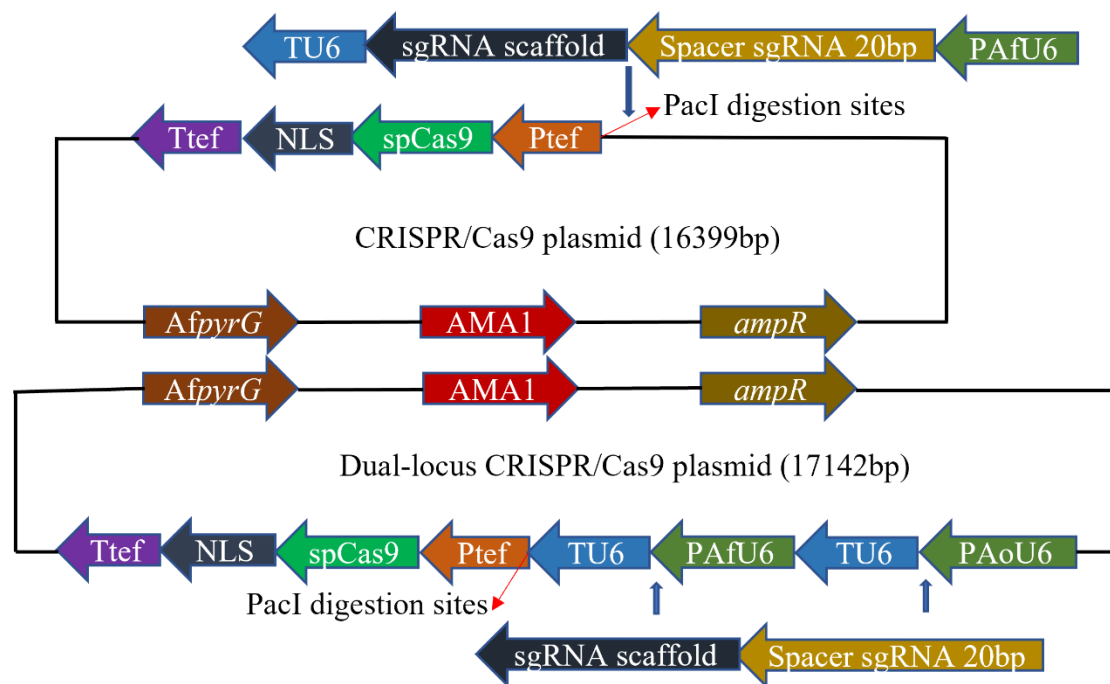

Figure S1. Schematic diagram of the CRISPR/Cas9 plasmid used in this study

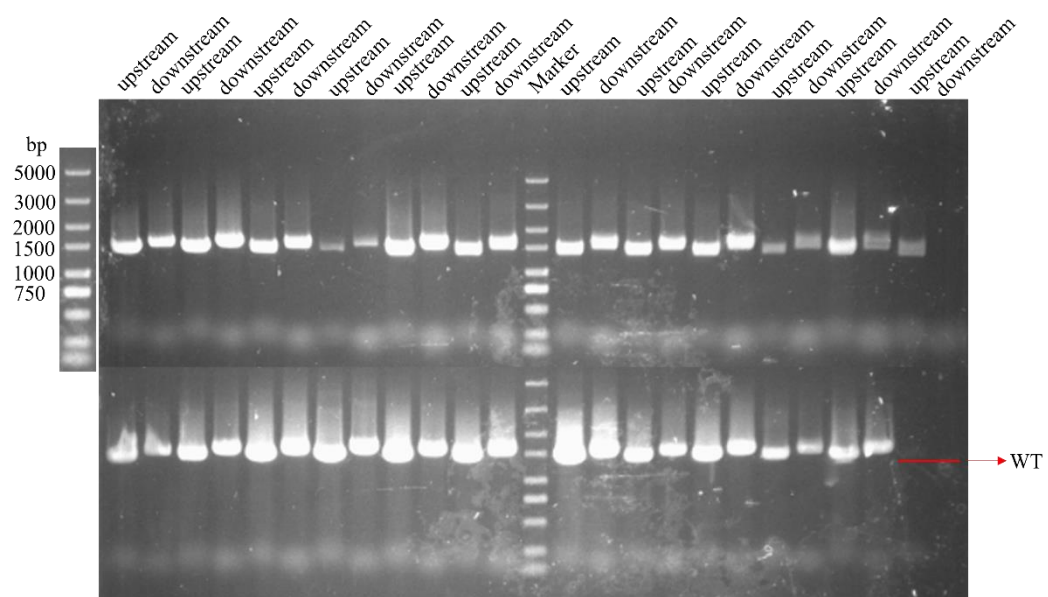

Figure S2. Upstream and downstream positioning of the MH genome

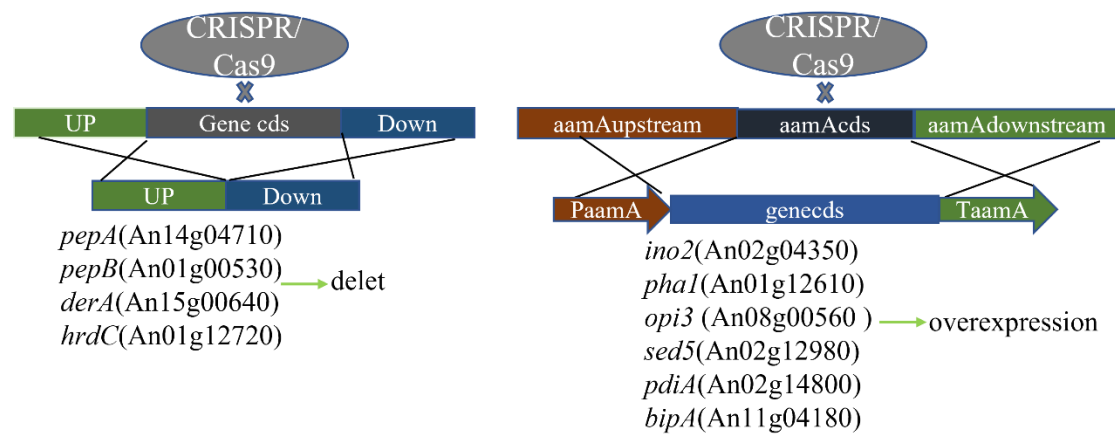

Figure S3. Schematic diagram of gene deletion and overexpression

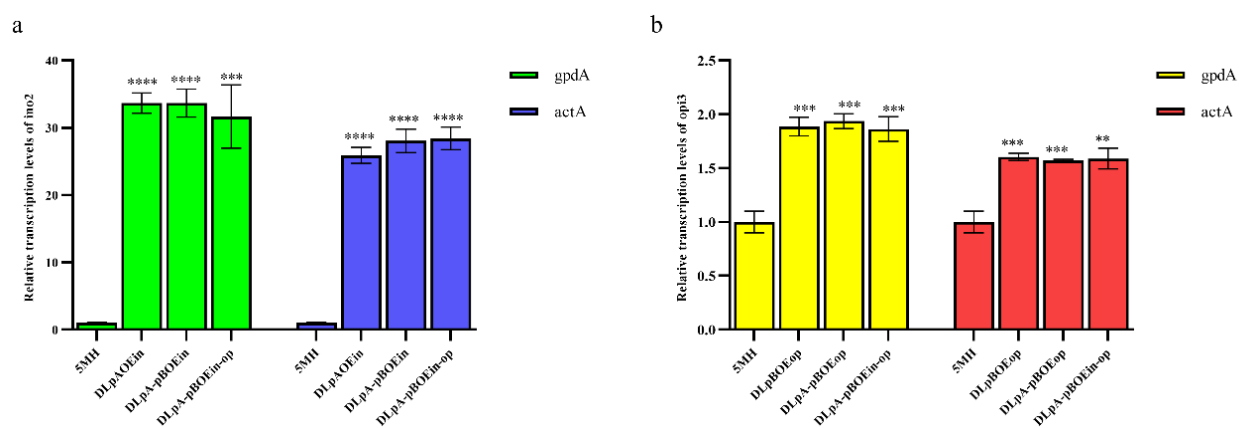

Figure S4. The relative transcription of *ino2* and *opi3* in each strain.
